# Supplementary material for: Attenuation of allergenicity of roasted cod with Allium spp.: characterization of principal anti-allergenic constituent and action mechanism
Source: Royal Society of Chemistry journal article supplement (doi:10.1039/d2fo01705a), 2022-01-01
Supplement: d2fo01705a1.pdf [file d2fo01705a1.pdf]

## Supplementary Materials

**Table S1.** Soluble proteins in different pretreatments that were identified to be present in significantly different levels.

| Protein ID | Description                              | <i>P</i> Value <sup>a</sup> | Change <sup>b</sup> |
|------------|------------------------------------------|-----------------------------|---------------------|
| A0A067XL60 | Cold inducible RNA binding protein       | 0.0047                      | ↓                   |
| G0XNX7     | Peptidylprolyl isomerase                 | 0.0476                      | ↓                   |
| Q90YK7     | Parvalbumin beta-2                       | 0.0077                      | ↓                   |
| Q90YK9     | Parvalbumin beta                         | 0.0072                      | ↓                   |
| Q9W5Z6     | Skeletal alpha-actin type-2              | 0.0164                      | ↑                   |
| Q8QG69     | Fast skeletal muscle troponin I          | 0.0011                      | ↑                   |
| Q8JJ07     | Fast skeletal muscle troponin T          | 0.0093                      | ↑                   |
| A0A0E3XVM8 | Creatine kinase                          | 0.0141                      | ↑                   |
| A0A0E3XUX0 | Creatine kinase                          | 0.0414                      | ↑                   |
| Q98SS7     | Creatine kinase                          | 0.0020                      | ↑                   |
| Q8AWX8     | Glyceraldehyde-3-phosphate dehydrogenase | 0.0009                      | ↑                   |
| A7XA06     | Creatine kinase                          | 0.0051                      | ↑                   |
| A8CZC9     | Elongation factor 1-alpha                | 0.0034                      | ↑                   |
| A0A0E3XVG5 | Creatine kinase                          | 0.0010                      | ↑                   |
| Q5TJH5     | L-lactate dehydrogenase                  | 0.0205                      | ↑                   |

Notes: <sup>a</sup> $P < 0.05$  were considered significant. <sup>b</sup>Upward and downward arrow indicates higher and lower level, respectively.

**Table S2.** Changes in free amino acid composition (ng/mg dw) of cod patties with or without pretreatment with *Allium* powders (n=3).

|               | CON                         | ON                          | CC                          | ML                           | WO                           | GA                          |
|---------------|-----------------------------|-----------------------------|-----------------------------|------------------------------|------------------------------|-----------------------------|
| Leucine       | 87.93 ± 0.60 <sup>C</sup>   | 84.70 ± 1.20 <sup>D</sup>   | 91.12 ± 0.86 <sup>B</sup>   | 109.31 ± 2.10 <sup>A</sup>   | 109.77 ± 1.83 <sup>A</sup>   | 90.22 ± 1.99 <sup>BC</sup>  |
| Lysine        | 150.49 ± 21.66 <sup>B</sup> | 117.80 ± 9.13 <sup>C</sup>  | 141.39 ± 9.65 <sup>B</sup>  | 111.26 ± 0.18 <sup>C</sup>   | 85.14 ± 9.26 <sup>D</sup>    | 227.23 ± 9.84 <sup>A</sup>  |
| Isoleucine    | 58.09 ± 2.69 <sup>CD</sup>  | 54.06 ± 0.30 <sup>D</sup>   | 63.98 ± 2.15 <sup>B</sup>   | 71.56 ± 4.58 <sup>A</sup>    | 70.00 ± 1.85 <sup>A</sup>    | 60.68 ± 0.40 <sup>BC</sup>  |
| Valine        | 92.27 ± 7.61 <sup>D</sup>   | 84.61 ± 2.35 <sup>D</sup>   | 106.97 ± 4.74 <sup>B</sup>  | 115.89 ± 3.44 <sup>AB</sup>  | 118.45 ± 5.92 <sup>A</sup>   | 103.40 ± 4.90 <sup>C</sup>  |
| Threonine     | 105.84 ± 2.28 <sup>D</sup>  | 102.81 ± 2.41 <sup>D</sup>  | 129.33 ± 1.68 <sup>B</sup>  | 132.71 ± 0.40 <sup>AB</sup>  | 136.05 ± 7.03 <sup>A</sup>   | 113.74 ± 2.96 <sup>C</sup>  |
| Phenylalanine | 43.34 ± 2.30 <sup>D</sup>   | 49.00 ± 0.69 <sup>C</sup>   | 52.38 ± 3.32 <sup>C</sup>   | 63.41 ± 3.55 <sup>B</sup>    | 68.54 ± 3.21 <sup>A</sup>    | 60.37 ± 2.94 <sup>B</sup>   |
| Methionine    | 93.10 ± 2.98 <sup>A</sup>   | 74.15 ± 1.81 <sup>B</sup>   | 74.52 ± 2.80 <sup>B</sup>   | 76.49 ± 3.06 <sup>B</sup>    | 77.21 ± 6.97 <sup>B</sup>    | 93.00 ± 6.27 <sup>A</sup>   |
| Tryptophan    | 5.85 ± 0.24 <sup>D</sup>    | 10.64 ± 0.53 <sup>B</sup>   | 10.58 ± 0.19 <sup>B</sup>   | 12.83 ± 0.32 <sup>A</sup>    | 13.43 ± 0.34 <sup>A</sup>    | 8.24 ± 0.73 <sup>C</sup>    |
| ∑EAA          | 636.90 ± 21.13 <sup>D</sup> | 577.78 ± 10.98 <sup>E</sup> | 670.27 ± 10.08 <sup>C</sup> | 693.45 ± 4.55 <sup>B</sup>   | 678.60 ± 0.93 <sup>BC</sup>  | 756.88 ± 13.43 <sup>A</sup> |
| Tyrosine      | 34.36 ± 2.53 <sup>D</sup>   | 47.70 ± 3.86 <sup>A</sup>   | 45.66 ± 4.67 <sup>AB</sup>  | 38.42 ± 0.91 <sup>CD</sup>   | 39.71 ± 1.57 <sup>BCD</sup>  | 40.99 ± 4.76 <sup>BC</sup>  |
| Cysteine      | 4.31 ± 0.50 <sup>C</sup>    | 4.06 ± 0.14 <sup>C</sup>    | 4.65 ± 0.52 <sup>BC</sup>   | 5.44 ± 0.11 <sup>A</sup>     | 5.43 ± 0.45 <sup>A</sup>     | 5.08 ± 0.28 <sup>AB</sup>   |
| Histidine     | 2.13 ± 0.31 <sup>B</sup>    | 4.26 ± 0.05 <sup>A</sup>    | 3.96 ± 0.33 <sup>A</sup>    | 2.18 ± 0.68 <sup>B</sup>     | 3.57 ± 0.42 <sup>A</sup>     | 2.66 ± 0.08 <sup>B</sup>    |
| Glutamine     | 12.01 ± 0.68 <sup>F</sup>   | 49.18 ± 0.61 <sup>D</sup>   | 105.41 ± 3.79 <sup>C</sup>  | 141.95 ± 2.91 <sup>B</sup>   | 166.86 ± 1.70 <sup>A</sup>   | 24.18 ± 0.84 <sup>E</sup>   |
| Glutamic acid | 275.50 ± 11.19 <sup>C</sup> | 185.93 ± 9.61 <sup>E</sup>  | 322.54 ± 9.54 <sup>A</sup>  | 291.64 ± 9.52 <sup>BC</sup>  | 219.21 ± 3.47 <sup>D</sup>   | 296.60 ± 10.60 <sup>B</sup> |
| Asparagine    | 2.14 ± 0.10 <sup>E</sup>    | 12.17 ± 0.60 <sup>C</sup>   | 22.97 ± 1.49 <sup>A</sup>   | 12.87 ± 0.26 <sup>BC</sup>   | 14.12 ± 0.53 <sup>B</sup>    | 6.44 ± 0.62 <sup>D</sup>    |
| Aspartic acid | 176.73 ± 7.91 <sup>D</sup>  | 172.38 ± 16.96 <sup>D</sup> | 259.36 ± 5.82 <sup>A</sup>  | 230.17 ± 1.81 <sup>B</sup>   | 239.84 ± 12.34 <sup>B</sup>  | 207.70 ± 3.20 <sup>C</sup>  |
| Arginine      | 39.85 ± 4.26 <sup>D</sup>   | 178.97 ± 12.08 <sup>B</sup> | 50.17 ± 0.26 <sup>CD</sup>  | 61.68 ± 5.11 <sup>C</sup>    | 64.02 ± 0.63 <sup>C</sup>    | 957.55 ± 24.27 <sup>A</sup> |
| Alanine       | 633.66 ± 28.37 <sup>C</sup> | 538.10 ± 21.32 <sup>D</sup> | 669.76 ± 7.92 <sup>BC</sup> | 692.70 ± 19.66 <sup>AB</sup> | 666.14 ± 25.46 <sup>BC</sup> | 711.49 ± 22.17 <sup>A</sup> |
| Glycine       | 526.63 ± 28.98 <sup>A</sup> | 376.32 ± 23.23 <sup>B</sup> | 482.09 ± 37.43 <sup>A</sup> | 489.85 ± 36.20 <sup>A</sup>  | 405.80 ± 19.60 <sup>B</sup>  | 514.04 ± 15.89 <sup>A</sup> |
| Serine        | 101.42 ± 2.08 <sup>D</sup>  | 102.67 ± 3.73 <sup>CD</sup> | 156.37 ± 6.64 <sup>B</sup>  | 156.18 ± 4.66 <sup>B</sup>   | 166.13 ± 1.91 <sup>A</sup>   | 109.77 ± 4.21 <sup>C</sup>  |
| Proline       | 64.54 ± 1.38 <sup>D</sup>   | 67.67 ± 0.76 <sup>CD</sup>  | 128.30 ± 6.79 <sup>A</sup>  | 73.36 ± 2.68 <sup>BC</sup>   | 75.82 ± 1.13 <sup>B</sup>    | 128.33 ± 3.31 <sup>A</sup>  |

CON: Control; ON: Onion-pretreatment; CC: Chinese chive-pretreatment; ML: Mongolian leek-pretreatment; WO: Welsh onion-pretreatment; GA: Garlic-pretreatment; dw: dry weight. <sup>A-E</sup> Values are expressed as mean ± standard deviation (SD) (n=3). Means in the same row with different letters were significantly different ( $P < 0.05$ ).

**Table S3.** Taste attributes, taste thresholds (ng/mg), and taste activity values (TAVs) of taste compounds in cod patties with or without pretreatment with *Allium* powders.

| Taste compound | Taste attribute <sup>a</sup> | Taste threshold | CON <sup>b</sup>          | ON                        | CC                         | ML                         | WO                          | GA                         |
|----------------|------------------------------|-----------------|---------------------------|---------------------------|----------------------------|----------------------------|-----------------------------|----------------------------|
| Glutamic acid  | Umami (+)                    | 100             | 2.76 ± 0.11 <sup>C</sup>  | 1.86 ± 0.10 <sup>E</sup>  | 3.23 ± 0.10 <sup>A</sup>   | 2.92 ± 0.10 <sup>BC</sup>  | 2.19 ± 0.03 <sup>D</sup>    | 2.97 ± 0.11 <sup>B</sup>   |
| Aspartic acid  | Umami (+)                    | 30              | 5.89 ± 0.26 <sup>D</sup>  | 5.75 ± 0.57 <sup>D</sup>  | 8.65 ± 0.19 <sup>A</sup>   | 7.67 ± 0.06 <sup>B</sup>   | 7.99 ± 0.41 <sup>B</sup>    | 6.92 ± 0.11 <sup>C</sup>   |
| Serine         | Sweet (+)                    | 150             | 0.68 ± 0.01 <sup>D</sup>  | 0.68 ± 0.02 <sup>CD</sup> | 1.04 ± 0.04 <sup>B</sup>   | 1.04 ± 0.03 <sup>B</sup>   | 1.10 ± 0.01 <sup>A</sup>    | 0.73 ± 0.03 <sup>C</sup>   |
| Glycine        | Sweet (+)                    | 130             | 4.05 ± 0.22 <sup>A</sup>  | 2.89 ± 0.18 <sup>B</sup>  | 3.71 ± 0.29 <sup>A</sup>   | 3.77 ± 0.28 <sup>A</sup>   | 3.12 ± 0.15 <sup>B</sup>    | 3.95 ± 0.12 <sup>A</sup>   |
| Threonine      | Sweet (+)                    | 260             | 0.41 ± 0.01 <sup>D</sup>  | 0.40 ± 0.01 <sup>D</sup>  | 0.50 ± 0.01 <sup>B</sup>   | 0.51 ± 0.002 <sup>AB</sup> | 0.52 ± 0.03 <sup>A</sup>    | 0.44 ± 0.01 <sup>C</sup>   |
| Alanine        | Sweet (+)                    | 60              | 10.56 ± 0.47 <sup>C</sup> | 8.97 ± 0.36 <sup>D</sup>  | 11.16 ± 0.13 <sup>BC</sup> | 11.54 ± 0.33 <sup>AB</sup> | 11.10 ± 0.42 <sup>ABC</sup> | 11.86 ± 0.37 <sup>A</sup>  |
| Proline        | Sweet (+)                    | 300             | 0.22 ± 0.005 <sup>D</sup> | 0.23 ± 0.01 <sup>CD</sup> | 0.43 ± 0.02 <sup>A</sup>   | 0.24 ± 0.01 <sup>B</sup>   | 0.25 ± 0.004 <sup>CB</sup>  | 0.43 ± 0.01 <sup>A</sup>   |
| Histidine      | Bitter (-)                   | 20              | 0.11 ± 0.02 <sup>B</sup>  | 0.21 ± 0.003 <sup>A</sup> | 0.20 ± 0.02 <sup>A</sup>   | 0.11 ± 0.03 <sup>B</sup>   | 0.18 ± 0.02 <sup>A</sup>    | 0.13 ± 0.004 <sup>B</sup>  |
| Arginine       | Bitter (-)                   | 50              | 0.80 ± 0.08 <sup>D</sup>  | 3.58 ± 0.24 <sup>B</sup>  | 1.00 ± 0.005 <sup>CD</sup> | 1.23 ± 0.10 <sup>C</sup>   | 1.28 ± 0.01 <sup>C</sup>    | 19.15 ± 0.49 <sup>A</sup>  |
| Methionine     | Bitter (-)                   | 30              | 3.10 ± 0.10 <sup>A</sup>  | 2.47 ± 0.06 <sup>B</sup>  | 2.48 ± 0.09 <sup>B</sup>   | 2.55 ± 0.10 <sup>B</sup>   | 2.57 ± 0.23 <sup>B</sup>    | 3.10 ± 0.21 <sup>A</sup>   |
| Isoleucine     | Bitter (-)                   | 90              | 0.65 ± 0.03 <sup>CD</sup> | 0.60 ± 0.003 <sup>D</sup> | 0.71 ± 0.02 <sup>B</sup>   | 0.80 ± 0.05 <sup>A</sup>   | 0.78 ± 0.02 <sup>A</sup>    | 0.67 ± 0.004 <sup>BC</sup> |
| Leucine        | Bitter (-)                   | 190             | 0.46 ± 0.003 <sup>C</sup> | 0.45 ± 0.006 <sup>D</sup> | 0.48 ± 0.005 <sup>B</sup>  | 0.58 ± 0.01 <sup>A</sup>   | 0.58 ± 0.01 <sup>A</sup>    | 0.47 ± 0.01 <sup>BC</sup>  |
| Phenylalanine  | Bitter (-)                   | 90              | 0.48 ± 0.03 <sup>D</sup>  | 0.54 ± 0.01 <sup>C</sup>  | 0.58 ± 0.04 <sup>C</sup>   | 0.70 ± 0.04 <sup>B</sup>   | 0.76 ± 0.04 <sup>A</sup>    | 0.67 ± 0.03 <sup>B</sup>   |
| Valine         | Bitter (-)                   | 40              | 2.31 ± 0.19 <sup>D</sup>  | 2.12 ± 0.06 <sup>D</sup>  | 2.67 ± 0.12 <sup>BC</sup>  | 2.90 ± 0.09 <sup>AB</sup>  | 2.96 ± 0.15 <sup>A</sup>    | 2.59 ± 0.12 <sup>BC</sup>  |
| Lysine         | Bitter (-)                   | 50              | 3.01 ± 0.43 <sup>B</sup>  | 2.36 ± 0.18 <sup>C</sup>  | 2.83 ± 0.19 <sup>B</sup>   | 2.23 ± 0.003 <sup>C</sup>  | 1.70 ± 0.19 <sup>D</sup>    | 4.54 ± 0.20 <sup>A</sup>   |

<sup>a</sup> (+) = pleasant, (-) = unpleasant

<sup>b</sup> TAVs were calculated according to the taste threshold values of the free amino acids (taste compounds) and their concentrations in the roasted cod samples. CON: Control; ON: Onion-pretreatment; CC: Chinese chive-pretreatment; ML: Mongolian leek-pretreatment; WO: Welsh onion-pretreatment; GA: Garlic-pretreatment. <sup>A-E</sup> Values are expressed as mean ± standard deviation (SD) (n=3). Means in the same row with different letters were significantly different ( $P < 0.05$ ).
